# Supplementary material
Source: Elsevier journal article supplement (https://www.sciencedirect.com/science/article/pii/S141386702200410X)
Supplement: mmc1 [file S141386702200410X:mmc1.docx]

**Supplementary material:**

**Supplementary Table 1.** Primers and annealing temperatures used in each PCR reaction for NS5A(24) and NS5B.

| **Region** | **Reaction** | **Primer** | **5’🡪 3’ Sequencing** | **Annealing temperature** |
| --- | --- | --- | --- | --- |
| **NS5A** | **PCR** | H.NS5AP-F4 (Forward) | TTGCCCGCCATACTATCT | 47° C |
| H.NS5AI.R2 (Reverse) | TTCTTGAAACACTCTGCAGC |
| **NESTED** | H.NS5AN-F4 (Forward) | GTVCAGTGGATGAACAG | 45° C |
| H.NS5AI.R1 (Reverse) | CACGGACACTTGAGCTCATC |
| **NS5B** | **PCR** | G3.NS5BP.F (Forward) | GATAACACCATGTAGTGCTGAGG | 50° C |
| G3.NS5BP.R (Reverse) | AGAAAGATGCCTACCCCTAC |
| **NESTED** | G3.NS5BN.F (Forward) | TATTCAACGTCGTCTAGAAGCGC | 53° C |
| G3.NS5BN.R (Reverse) | AAAGCAGCAAATGGCGGGTT |
