# Supplementary material
Source: Elsevier journal article supplement (https://www.sciencedirect.com/science/article/pii/S141386702200410X)
Supplement: mmc2 [file S141386702200410X:mmc2.docx]

**Supplementary Table 2:** Primers used in sequencing reactions for the NS5B region amplified from clinical samples.

| **NS5B 5’ 🡪 3’ Primers NESTED** | **NS5B 5’ 🡪 3’ Internal Primers** |
| --- | --- |
| **G3.NS5BN.F**  TATTCAACGTCGTCTAGAAGCGC | **G3.NS5BI.F**  GGTATAGTGCGAAGGACGT |
| **G3.NS5BN.R**  AAAGCAGCAAATGGCGGGTT | **G3.NS5BI.R**  GAGAGTAACTGTGGAGCGT |
